# Supplementary material
Source: PubMed Central journal article supplement (PMC2718448)
Supplement: supp_172_1_67__1.pdf [file supp_172_1_67__1.pdf]

Variation in *ITGB3* is Associated with Asthma and Sensitization to Mold Allergen in  
Four Populations

Lauren A. Weiss, Lucille A. Lester, James E. Gern, Raoul L. Wolf, Rodney Parry, Robert  
F. Lemanske, Julian Solway, Carole Ober

Online Data Supplement

Supplementary Table E1. Linkage Disequilibrium (LD) in *ITGB3*. LD ( $r^2$ ) for every pair of SNPs in this study is shown for each of the four samples.

Supplementary Table E2. Number of cases and controls with genotype data. For each SNP and phenotype, #cases/#controls used in the association test is shown.

E1.

| marker 1  | marker 2   | Hutterite<br>Population | Madison<br>Caucasian | Chicago<br>Caucasian | Chicago<br>African American |
|-----------|------------|-------------------------|----------------------|----------------------|-----------------------------|
| rs2317385 | rs1009312  | 0.9902                  | 0.9894               | 0.9933               | 0.9426                      |
| rs2317385 | rs3892085  | 0.6404                  | 0.4126               | 0.3208               | 0.1273                      |
| rs2317385 | rs884696   | 0.0878                  | NA                   | 0.0096               | 0.1756                      |
| rs2317385 | rs2015729  | 0.0682                  | 0.1436               | 0.296                | 0.3867                      |
| rs2317385 | rs1000232  | 0.0817                  | 0.1712               | 0.3765               | 0.4261                      |
| rs2317385 | rs2292867  | 0.6416                  | 0.5002               | 0.454                | 0.3269                      |
| rs2317385 | rs5918     | 0.0725                  | 0.0488               | 0.0308               | 0                           |
| rs2317385 | rs5919     | 0.007                   | 0.0001               | 0.0338               | 0.0736                      |
| rs2317385 | rs2292864  | 0.642                   | 0.4824               | 0.4209               | 0.2932                      |
| rs2317385 | rs15908    | 0.0729                  | 0.0781               | 0.0371               | 0.0788                      |
| rs2317385 | rs4634     | 0.0874                  | 0.0675               | 0.1214               | 0.1383                      |
| rs2317385 | rs999323   | 0.0792                  | 0.0769               | 0.1859               | 0.1512                      |
| rs2317385 | rs11870252 | 0.0424                  | 0.0015               | 0.0069               | 0.0137                      |
| rs2317385 | rs3760372  | 0.0682                  | 0.0299               | 0.0082               | 0.0044                      |
| rs2317385 | rs3809863  | 0.0433                  | 0.001                | 0.0068               | 0.0118                      |
| rs2317385 | rs23141124 | 0.0231                  | 0.0083               | 0.0135               | 0.0149                      |
| rs2317385 | rs2317676  | 0.0343                  | 0.0002               | 0.0522               | 0.087                       |
| rs2317385 | rs2317677  | 0.0687                  | 0.0225               | 0.0088               | 0.0002                      |
| rs1009312 | rs3892085  | 0.6415                  | 0.4104               | 0.2801               | 0.1297                      |
| rs1009312 | rs884696   | 0.0849                  | NA                   | 0.011                | 0.1681                      |
| rs1009312 | rs2015729  | 0.0808                  | 0.1292               | 0.275                | 0.3838                      |
| rs1009312 | rs1000232  | 0.0914                  | 0.157                | 0.3627               | 0.4285                      |
| rs1009312 | rs2292867  | 0.6337                  | 0.4995               | 0.4348               | 0.3133                      |
| rs1009312 | rs5918     | 0.0651                  | 0.0472               | 0.0335               | 0.0001                      |
| rs1009312 | rs5919     | 0.0076                  | 0.0003               | 0.0212               | 0.0798                      |
| rs1009312 | rs2292864  | 0.6426                  | 0.4651               | 0.395                | 0.2862                      |
| rs1009312 | rs15908    | 0.0843                  | 0.0681               | 0.0326               | 0.1133                      |
| rs1009312 | rs4634     | 0.0961                  | 0.0595               | 0.1216               | 0.1456                      |
| rs1009312 | rs999323   | 0.0967                  | 0.0694               | 0.1764               | 0.1572                      |
| rs1009312 | rs11870252 | 0.0429                  | 0.0007               | 0.0047               | 0.0166                      |
| rs1009312 | rs3760372  | 0.0808                  | 0.0214               | 0.01                 | 0.0036                      |
| rs1009312 | rs3809863  | 0.0437                  | 0.0005               | 0.0034               | 0.0144                      |
| rs1009312 | rs23141124 | 0.0214                  | 0.008                | 0.0147               | 0.0111                      |
| rs1009312 | rs2317676  | 0.0337                  | 0                    | 0.0424               | 0.0741                      |
| rs1009312 | rs2317677  | 0.064                   | 0.0192               | 0.0062               | 0.0014                      |
| rs3892085 | rs884696   | 0.0506                  | NA                   | 0.0455               | 0.0197                      |
| rs3892085 | rs2015729  | 0.254                   | 0.1626               | 0.1115               | 0.0493                      |
| rs3892085 | rs1000232  | 0.2762                  | 0.2005               | 0.1615               | 0.0688                      |
| rs3892085 | rs2292867  | 0.9887                  | 0.8211               | 0.5594               | 0.3389                      |
| rs3892085 | rs5918     | 0.0387                  | 0.0261               | 0.0229               | 0.0052                      |
| rs3892085 | rs5919     | 0.0055                  | 0.0129               | 0.0215               | 0.0156                      |
| rs3892085 | rs2292864  | 0.9941                  | 0.8934               | 0.6568               | 0.3792                      |
| rs3892085 | rs15908    | 0.2597                  | 0.146                | 0.0635               | 0.0567                      |
| rs3892085 | rs4634     | 0.2843                  | 0.2251               | 0.257                | 0.1366                      |
| rs3892085 | rs999323   | 0.2796                  | 0.2352               | 0.2368               | 0.1225                      |
| rs3892085 | rs11870252 | 0.0297                  | 0.0098               | 0.0084               | 0.0096                      |
| rs3892085 | rs3760372  | 0.254                   | 0.0557               | 0.016                | 0.0032                      |
| rs3892085 | rs3809863  | 0.0296                  | 0.0092               | 0.0093               | 0.0092                      |

|           |            |        |        |        |        |
|-----------|------------|--------|--------|--------|--------|
| rs3892085 | rs23141124 | 0.0137 | 0.0088 | 0.0029 | 0.0012 |
| rs3892085 | rs2317676  | 0.0237 | 0.0123 | 0.0203 | 0.0143 |
| rs3892085 | rs2317677  | 0.0328 | 0.0511 | 0.0412 | 0.0184 |
| rs884696  | rs2015729  | 0.4517 | NA     | 0.3501 | 0.5231 |
| rs884696  | rs1000232  | 0.4921 | NA     | 0.4203 | 0.5488 |
| rs884696  | rs2292867  | 0.0525 | NA     | 0.0012 | 0.0065 |
| rs884696  | rs5918     | 0.849  | NA     | 0.4422 | 0.3478 |
| rs884696  | rs5919     | 0.0022 | NA     | 0.0136 | 0.0267 |
| rs884696  | rs2292864  | 0.0512 | NA     | 0.0002 | 0.0235 |
| rs884696  | rs15908    | 0.448  | NA     | 0.1602 | 0.1626 |
| rs884696  | rs4634     | 0.4897 | NA     | 0.3586 | 0.3422 |
| rs884696  | rs999323   | 0.4851 | NA     | 0.3221 | 0.2742 |
| rs884696  | rs11870252 | 0.242  | NA     | 0.0059 | 0.0031 |
| rs884696  | rs3760372  | 0.4517 | NA     | 0.0548 | 0.2274 |
| rs884696  | rs3809863  | 0.2533 | NA     | 0.008  | 0.0042 |
| rs884696  | rs23141124 | 0.2411 | NA     | 0.0995 | 0.0556 |
| rs884696  | rs2317676  | 0.3028 | NA     | 0.0096 | 0.0463 |
| rs884696  | rs2317677  | 0.2213 | NA     | 0.2217 | 0.3453 |
| rs2015729 | rs1000232  | 0.9149 | 0.7608 | 0.8254 | 0.8846 |
| rs2015729 | rs2292867  | 0.256  | 0.1981 | 0.2308 | 0.1829 |
| rs2015729 | rs5918     | 0.4141 | 0.2479 | 0.1628 | 0.2123 |
| rs2015729 | rs5919     | 0.0317 | 0.1307 | 0.1525 | 0.1492 |
| rs2015729 | rs2292864  | 0.2563 | 0.1643 | 0.1743 | 0.1535 |
| rs2015729 | rs15908    | 0.9994 | 0.8781 | 0.3796 | 0.2913 |
| rs2015729 | rs4634     | 0.9138 | 0.5452 | 0.5174 | 0.5006 |
| rs2015729 | rs999323   | 0.911  | 0.6385 | 0.5471 | 0.5544 |
| rs2015729 | rs11870252 | 0.1811 | 0.1176 | 0.1122 | 0.0651 |
| rs2015729 | rs3760372  | 0.9994 | 0.0195 | 0.0266 | 0.1349 |
| rs2015729 | rs3809863  | 0.1866 | 0.1134 | 0.1146 | 0.0651 |
| rs2015729 | rs23141124 | 0.1036 | 0.0818 | 0.0418 | 0.0258 |
| rs2015729 | rs2317676  | 0.1348 | 0.1148 | 0.1414 | 0.0741 |
| rs2015729 | rs2317677  | 0.0644 | 0.0677 | 0.0539 | 0.1713 |
| rs1000232 | rs2292867  | 0.2751 | 0.2517 | 0.304  | 0.2317 |
| rs1000232 | rs5918     | 0.4538 | 0.3409 | 0.2093 | 0.2208 |
| rs1000232 | rs5919     | 0.0114 | 0.0043 | 0.0123 | 0.053  |
| rs1000232 | rs2292864  | 0.2765 | 0.2182 | 0.2415 | 0.1943 |
| rs1000232 | rs15908    | 0.9165 | 0.6798 | 0.2832 | 0.2297 |
| rs1000232 | rs4634     | 0.993  | 0.7755 | 0.6565 | 0.5725 |
| rs1000232 | rs999323   | 0.9963 | 0.8428 | 0.6944 | 0.6338 |
| rs1000232 | rs11870252 | 0.1028 | 0.0087 | 0.0041 | 0.0019 |
| rs1000232 | rs3760372  | 0.9149 | 0.053  | 0.0373 | 0.155  |
| rs1000232 | rs3809863  | 0.1018 | 0.0087 | 0.0015 | 0.0019 |
| rs1000232 | rs23141124 | 0.1168 | 0.0975 | 0.0485 | 0.026  |
| rs1000232 | rs2317676  | 0.1448 | 0.0096 | 0.0159 | 0.018  |
| rs1000232 | rs2317677  | 0.0654 | 0.1272 | 0.1167 | 0.2028 |
| rs2292867 | rs5918     | 0.0403 | 0.0292 | 0.0421 | 0.0365 |
| rs2292867 | rs5919     | 0.0058 | 0.0002 | 0      | 0.0036 |
| rs2292867 | rs2292864  | 0.9942 | 0.9156 | 0.8589 | 0.8007 |
| rs2292867 | rs15908    | 0.2599 | 0.1886 | 0.0749 | 0.0899 |
| rs2292867 | rs4634     | 0.2838 | 0.2234 | 0.3201 | 0.2407 |
| rs2292867 | rs999323   | 0.2829 | 0.2855 | 0.3923 | 0.3359 |
| rs2292867 | rs11870252 | 0.0298 | 0.0002 | 0.002  | 0.0038 |

|           |            |        |        |        |        |
|-----------|------------|--------|--------|--------|--------|
| rs2292867 | rs3760372  | 0.256  | 0.0622 | 0.01   | 0.0531 |
| rs2292867 | rs3809863  | 0.0299 | 0      | 0.0033 | 0.0047 |
| rs2292867 | rs23141124 | 0.0137 | 0.0111 | 0.0055 | 0.003  |
| rs2292867 | rs2317676  | 0.0236 | 0.0009 | 0.0031 | 0.001  |
| rs2292867 | rs2317677  | 0.0313 | 0.0601 | 0.0327 | 0.003  |
| rs5918    | rs5919     | 0.0021 | 0.0139 | 0.0225 | 0.0345 |
| rs5918    | rs2292864  | 0.0384 | 0.0275 | 0.036  | 0.0281 |
| rs5918    | rs15908    | 0.4067 | 0.2806 | 0.0393 | 0.1774 |
| rs5918    | rs4634     | 0.4512 | 0.3659 | 0.3246 | 0.4025 |
| rs5918    | rs999323   | 0.4429 | 0.378  | 0.3049 | 0.3466 |
| rs5918    | rs11870252 | 0.2476 | 0.0101 | 0.0105 | 0.0181 |
| rs5918    | rs3760372  | 0.4141 | 0.269  | 0.2205 | 0.4416 |
| rs5918    | rs3809863  | 0.2418 | 0.0126 | 0.0122 | 0.0181 |
| rs5918    | rs23141124 | 0.2856 | 0.2901 | 0.1993 | 0.1298 |
| rs5918    | rs2317676  | 0.3002 | 0.0116 | 0.0152 | 0.0334 |
| rs5918    | rs2317677  | 0.167  | 0.2175 | 0.1614 | 0.3356 |
| rs5919    | rs2292864  | 0.006  | 0.0149 | 0.0313 | 0.031  |
| rs5919    | rs15908    | 0.0316 | 0.1397 | 0.0835 | 0.0092 |
| rs5919    | rs4634     | 0.0119 | 0.0407 | 0.0717 | 0.0823 |
| rs5919    | rs999323   | 0.012  | 0.0149 | 0.0293 | 0.0426 |
| rs5919    | rs11870252 | 0.1772 | 0.8754 | 0.6057 | 0.4638 |
| rs5919    | rs3760372  | 0.0317 | 0.044  | 0.0654 | 0.0752 |
| rs5919    | rs3809863  | 0.1883 | 0.8731 | 0.6594 | 0.4624 |
| rs5919    | rs23141124 | 0.0025 | 0.0004 | 0.0037 | 0.003  |
| rs5919    | rs2317676  | 0.0012 | 0.8779 | 0.8573 | 0.6515 |
| rs5919    | rs2317677  | 0.003  | 0.0387 | 0.0367 | 0.0313 |
| rs2292864 | rs15908    | 0.2601 | 0.151  | 0.0506 | 0.0576 |
| rs2292864 | rs4634     | 0.2826 | 0.2502 | 0.3938 | 0.3426 |
| rs2292864 | rs999323   | 0.2794 | 0.2582 | 0.3601 | 0.3181 |
| rs2292864 | rs11870252 | 0.0301 | 0.014  | 0.0136 | 0.0066 |
| rs2292864 | rs3760372  | 0.2563 | 0.0543 | 0.0041 | 0.0713 |
| rs2292864 | rs3809863  | 0.0299 | 0.0136 | 0.015  | 0.0061 |
| rs2292864 | rs23141124 | 0.0135 | 0.0108 | 0.0045 | 0.0005 |
| rs2292864 | rs2317676  | 0.024  | 0.0148 | 0.0301 | 0.0198 |
| rs2292864 | rs2317677  | 0.0331 | 0.0506 | 0.0201 | 0.0112 |
| rs15908   | rs4634     | 0.9157 | 0.6261 | 0.2116 | 0.3406 |
| rs15908   | rs999323   | 0.913  | 0.7135 | 0.2185 | 0.3058 |
| rs15908   | rs11870252 | 0.1759 | 0.1183 | 0.0407 | 0.0319 |
| rs15908   | rs3760372  | 0.9994 | 0.0126 | 0.0102 | 0.0986 |
| rs15908   | rs3809863  | 0.1834 | 0.1117 | 0.0448 | 0.0312 |
| rs15908   | rs23141124 | 0.1074 | 0.0971 | 0.0421 | 0.0336 |
| rs15908   | rs2317676  | 0.1324 | 0.1234 | 0.0593 | 0.0025 |
| rs15908   | rs2317677  | 0.0631 | 0.0604 | 0.0004 | 0.1503 |
| rs4634    | rs999323   | 0.9993 | 0.8921 | 0.9222 | 0.9121 |
| rs4634    | rs11870252 | 0.0955 | 0.0393 | 0.0466 | 0.0406 |
| rs4634    | rs3760372  | 0.9138 | 0.0463 | 0.1065 | 0.3733 |
| rs4634    | rs3809863  | 0.0953 | 0.0382 | 0.0504 | 0.0381 |
| rs4634    | rs23141124 | 0.1189 | 0.0882 | 0.0721 | 0.053  |
| rs4634    | rs2317676  | 0.1459 | 0.0397 | 0.0654 | 0.0718 |
| rs4634    | rs2317677  | 0.0696 | 0.0874 | 0.11   | 0.3034 |
| rs999323  | rs11870252 | 0.0943 | 0.0115 | 0.0124 | 0.0068 |
| rs999323  | rs3760372  | 0.911  | 0.0461 | 0.0903 | 0.3394 |

|            |            |        |        |        |        |
|------------|------------|--------|--------|--------|--------|
| rs999323   | rs3809863  | 0.0949 | 0.0121 | 0.0157 | 0.0068 |
| rs999323   | rs23141124 | 0.1128 | 0.1078 | 0.0646 | 0.0462 |
| rs999323   | rs2317676  | 0.1493 | 0.0137 | 0.021  | 0.0348 |
| rs999323   | rs2317677  | 0.0707 | 0.1016 | 0.0849 | 0.2532 |
| rs11870252 | rs3760372  | 0.1811 | 0.0384 | 0.0385 | 0.036  |
| rs11870252 | rs3809863  | 0.9999 | 0.9997 | 0.9979 | 0.9999 |
| rs11870252 | rs23141124 | 0.0047 | 0.0002 | 0.0011 | 0.0019 |
| rs11870252 | rs2317676  | 0.8514 | 0.9205 | 0.5529 | 0.4175 |
| rs11870252 | rs2317677  | 0.0312 | 0.0429 | 0.0435 | 0.0139 |
| rs3760372  | rs3809863  | 0.1866 | 0.0397 | 0.0413 | 0.037  |
| rs3760372  | rs23141124 | 0.1036 | 0.0976 | 0.0494 | 0.0676 |
| rs3760372  | rs2317676  | 0.1348 | 0.0384 | 0.0425 | 0.0739 |
| rs3760372  | rs2317677  | 0.0644 | 0.7063 | 0.7874 | 0.7222 |
| rs3809863  | rs23141124 | 0.0042 | 0.0012 | 0.0014 | 0.0019 |
| rs3809863  | rs2317676  | 0.8497 | 0.9176 | 0.6066 | 0.4043 |
| rs3809863  | rs2317677  | 0.0335 | 0.0437 | 0.051  | 0.0139 |
| rs23141124 | rs2317676  | 0.0035 | 0.0004 | 0.0033 | 0.0027 |
| rs23141124 | rs2317677  | 0.2334 | 0.0809 | 0.0564 | 0.0616 |
| rs2317676  | rs2317677  | 0.0325 | 0.046  | 0.0384 | 0.0457 |

E2.

| rs#        | Hutterite |                      | Madison |                      | Chicago<br>Caucasian |                      | Chicago<br>African American |                      |
|------------|-----------|----------------------|---------|----------------------|----------------------|----------------------|-----------------------------|----------------------|
|            | BHR       | +SPT <sub>mold</sub> | Asthma  | +SPT <sub>mold</sub> | Asthma               | +SPT <sub>mold</sub> | Asthma                      | +SPT <sub>mold</sub> |
| rs2317385  | 132/372   | 65/532               | 105/86  | 137/194              | 103/175              | 41/59                | 161/142                     | 53/103               |
| rs1009312  | 135/367   | 65/527               | 106/79  | 138/188              | 106/185              | 42/62                | 182/169                     | 60/117               |
| rs3892085  | 139/379   | 66/545               | 110/87  | 142/202              | 102/185              | 40/59                | 175/168                     | 54/116               |
| rs884696   | 134/374   | 64/537               | NA      | NA                   | 98/179               | 39/57                | 176/154                     | 60/111               |
| rs2015729  | 139/363   | 63/527               | 110/84  | 139/198              | 102/175              | 39/60                | 171/160                     | 56/110               |
| rs1000232  | 131/361   | 63/518               | 102/79  | 133/185              | 99/177               | 37/60                | 171/157                     | 55/111               |
| rs2292867  | 141/384   | 68/552               | 107/85  | 139/196              | 104/184              | 40/61                | 180/168                     | 58/117               |
| rs5918     | 131/374   | 60/529               | 109/86  | 142/201              | 100/180              | 38/59                | 177/162                     | 57/115               |
| rs5919     | 139/379   | 64/543               | 106/82  | 133/188              | 102/184              | 40/60                | 177/154                     | 59/114               |
| rs2292864  | 139/377   | 65/538               | 112/81  | 142/198              | 105/184              | 41/62                | 178/169                     | 57/116               |
| rs15908    | 142/380   | 68/547               | 93/82   | 123/181              | 97/129               | 36/58                | 163/141                     | 57/103               |
| rs4634     | 138/372   | 62/538               | 95/69   | 128/168              | 104/182              | 40/61                | 162/160                     | 51/106               |
| rs999323   | 138/371   | 64/539               | 106/81  | 138/195              | 101/179              | 38/61                | 174/166                     | 56/113               |
| rs11870252 | 132/371   | 64/526               | 107/87  | 142/198              | 103/184              | 40/60                | 172/174                     | 55/112               |
| rs3760372  | 139/363   | 63/527               | 112/85  | 142/201              | 104/124              | 41/61                | 171/155                     | 54/112               |
| rs3809863  | 126/339   | 60/487               | 106/85  | 142/196              | 105/182              | 41/62                | 173/169                     | 56/112               |
| ss23141124 | 130/372   | 64/531               | 108/84  | 136/195              | 87/165               | 31/56                | 177/168                     | 57/115               |
| rs2317676  | 127/349   | 61/495               | 113/87  | 146/205              | 104/181              | 41/61                | 181/175                     | 58/118               |
| rs2317677  | 141/381   | 67/547               | 105/79  | 138/190              | 101/179              | 38/60                | 163/155                     | 54/105               |
